# Supplementary material for: A theoretical study of the ring size effect on one- and two-photon absorption properties of macrocyclic thiophene derivatives
Source: Royal Society of Chemistry journal article supplement (doi:10.1039/c2nj20886e), 2012-01-01
Supplement: c2nj20886e.pdf [file c2nj20886e.pdf]

## Supporting Information

### **A theoretical study of ring size effect on one- and two-photon absorption properties of macrocyclic thiophene derivatives**

Shuang Huang,<sup>a</sup> Lu-Yi Zou,<sup>a</sup> Ai-Min Ren,<sup>\*a</sup> Jing-Fu Guo,<sup>\*b</sup> Xiao-Ting Liu<sup>a</sup> and Ji-Kang Feng<sup>a</sup>

<sup>a</sup> State Key Laboratory of Theoretical and Computational Chemistry, Institute of Theoretical Chemistry, Jilin University, Changchun 130023, People's Republic of China

<sup>b</sup> School of Physics, Northeast Normal University, Changchun 130021, People's Republic of China

\*Corresponding author. E-mail: aimin\_ren@yahoo.com, guojf217@nenu.edu.cn

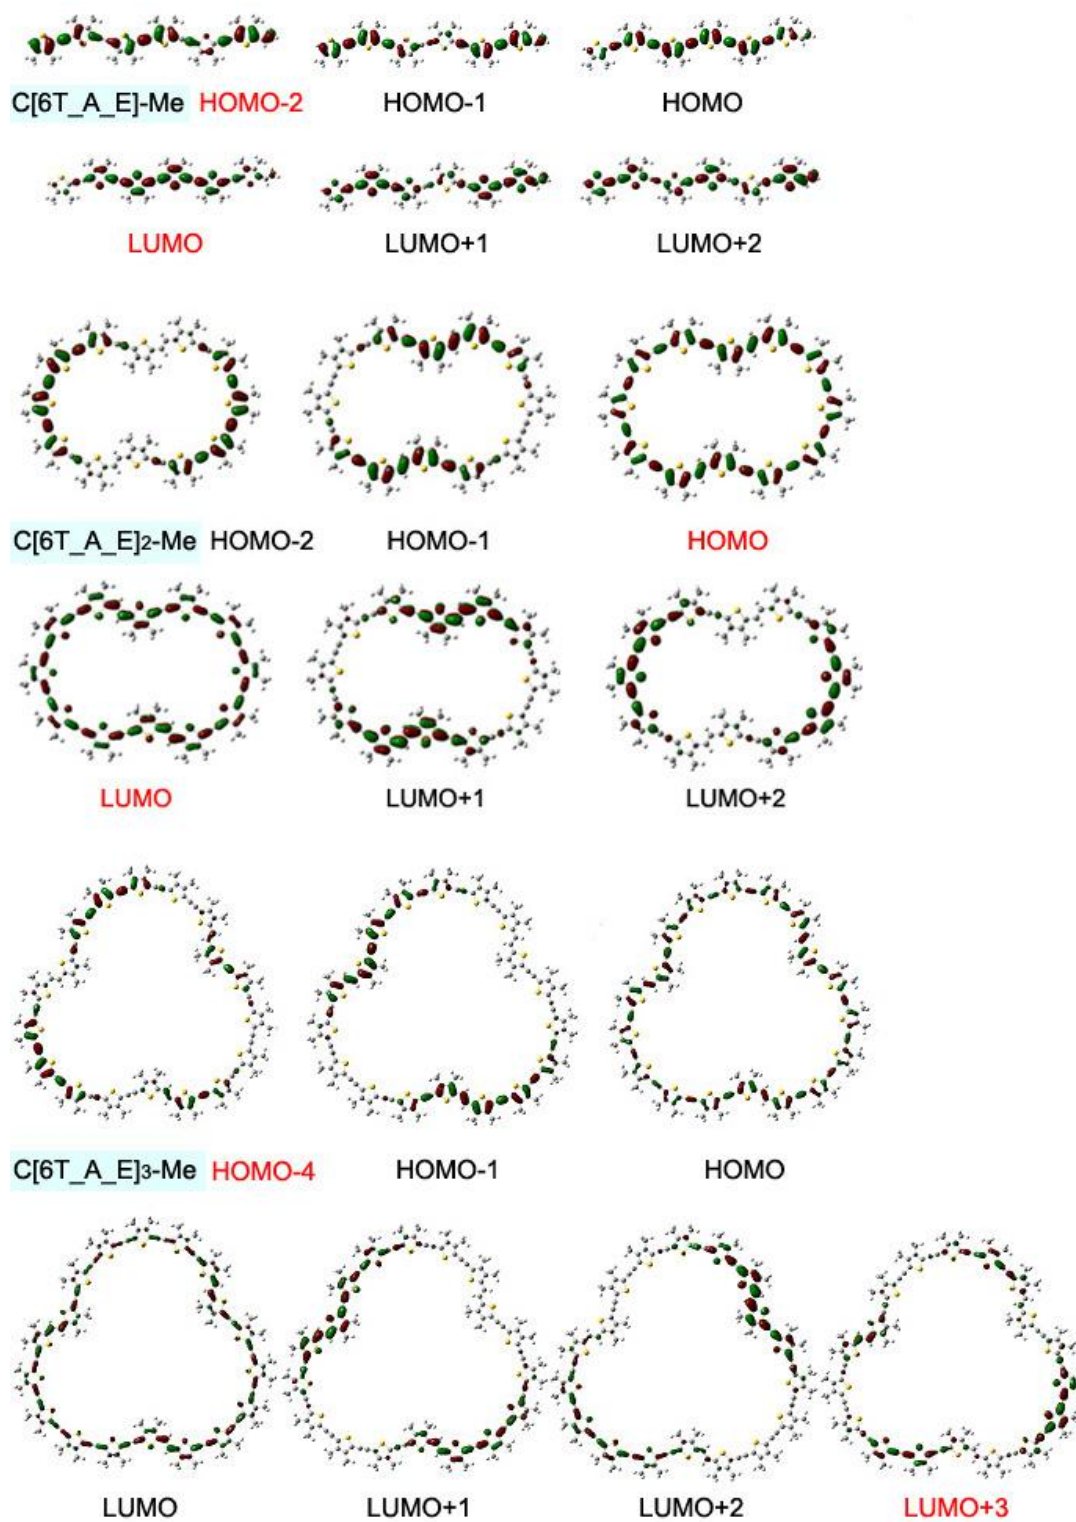

Fig. S1 Contour surfaces of the frontier orbital of studied molecules.
